# Supplementary material for: Ultrathin ZnSe nanowires: one-pot synthesis via a heat-triggered precursor slow releasing route, controllable Mn doping and application in UV and near-visible light detection
Source: Royal Society of Chemistry journal article supplement (doi:10.1039/c7nr03547k), 2017-01-01
Supplement: c7nr03547k1.pdf [file c7nr03547k1.pdf]

## Supporting Information

for

### **Ultrathin ZnSe nanowires: one-pot synthesis via a heat-triggered precursor slow releasing route, controllable Mn doping and application in UV and near-visible-light detection**

*Dong Li, Guanjie Xing, Shilin Tang, Xiaohong Li, Louzhen Fan and Yunchao Li \**

*Department of Chemistry, Beijing Normal University, Beijing 100875, China*

\* Corresponding authors: [liyc@bnu.edu.cn](mailto:liyc@bnu.edu.cn)

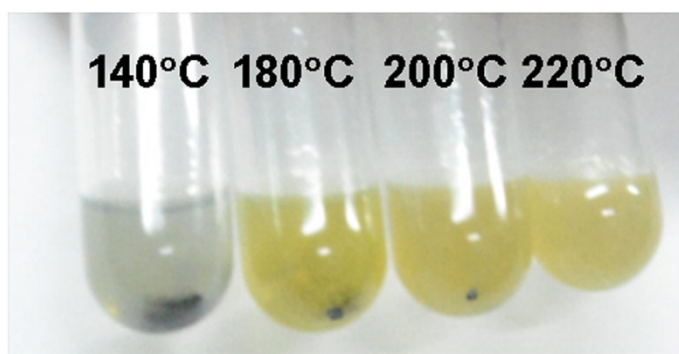

**Figure S1.** The optical photograph depicting dissolution behavior of Se powder in OLA at different temperatures.

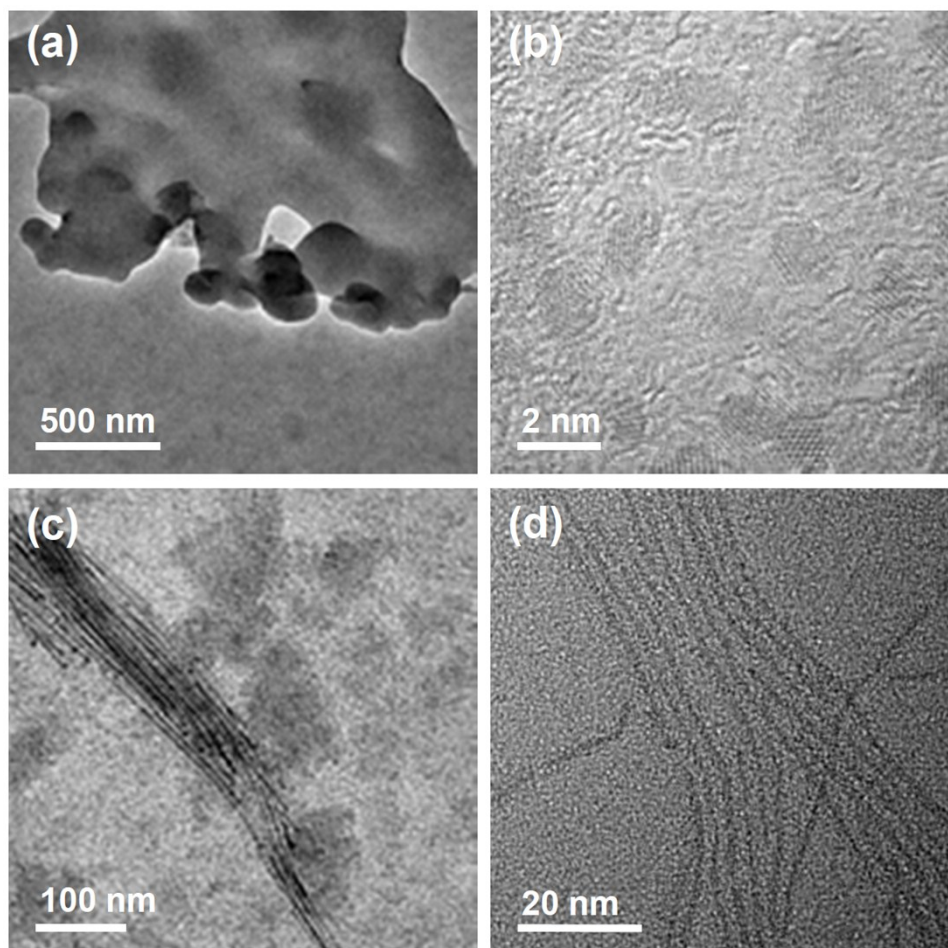

**Figure S2.** Representative TEM images of the ZnSe samples prepared in a precursor slow releasing one-pot reaction system containing 0.2 mmol  $\text{Zn}(\text{NO}_3)_2$ , 0.2 mmol Se powder, and 12 mL OLA at different temperatures: (a) 140 °C, (b) 180 °C, (c) 200 °C and (d) 220 °C.

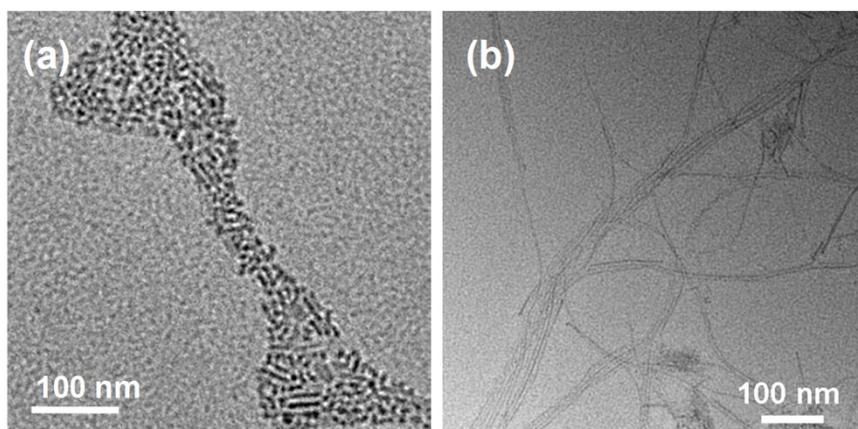

**Figure S3.** Representative TEM images of the ZnSe samples prepared in a hot-injection reaction system (a) and in a precursor slow releasing one-pot reaction system (b), both containing 0.2 mmol  $\text{Zn}(\text{NO}_3)_2$ , 0.2 mmol Se powder (or Se-OLA), and 12 mL OLA.

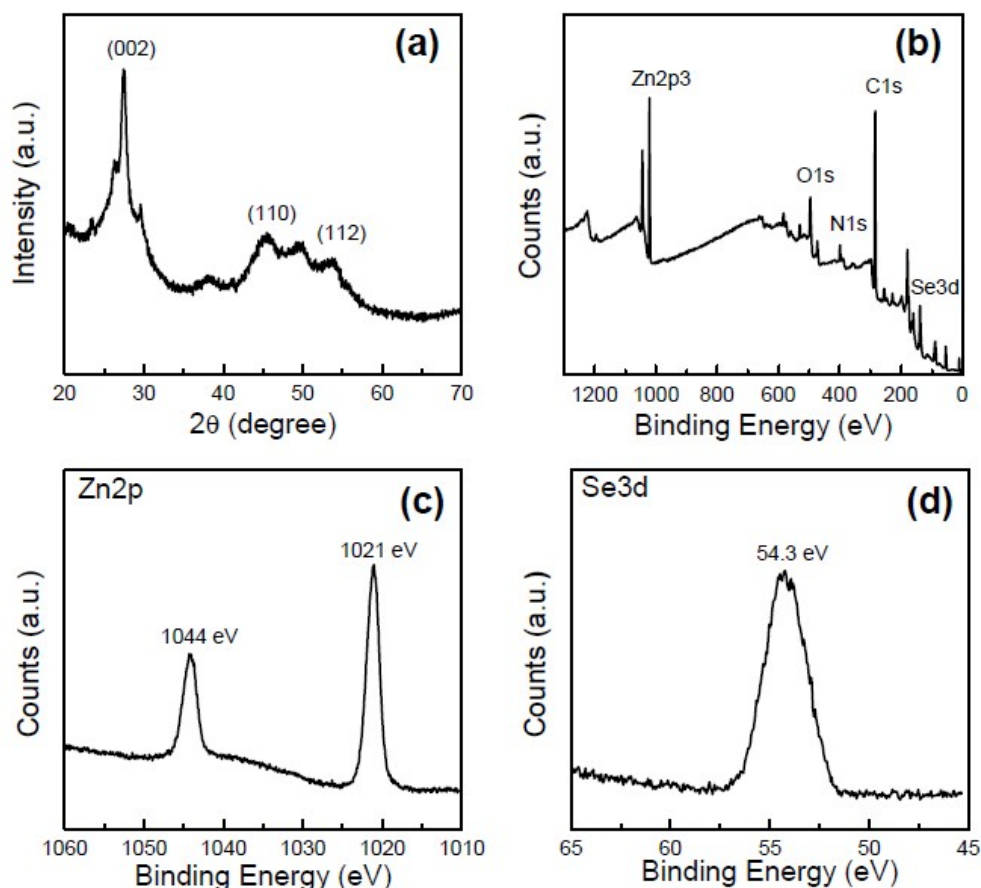

**Figure S4.** (a) XRD pattern, (b) full-range XPS spectrum, and (c-d) XPS spectrum of  $\text{Zn}_{2p}$  and  $\text{Se}_{3d}$  core level of the ZnSe USNWs with a diameter of 2.1 nm (the ones displayed in Figure 2 in main text). The peak at 1021 eV, 1044 eV and 54.3 eV correspond to the binding energies of  $\text{Zn}_{2p_{3/2}}$ ,  $\text{Zn}_{2p_{1/2}}$  and  $\text{Se}_{3d}$  core level, respectively. Quantitative calculation of (c) and (d) gives the atomic ratio of Zn to Se in the NWs is close to 1:1, which is in good agreement with the stoichiometric ratio in ZnSe.<sup>1,2</sup>

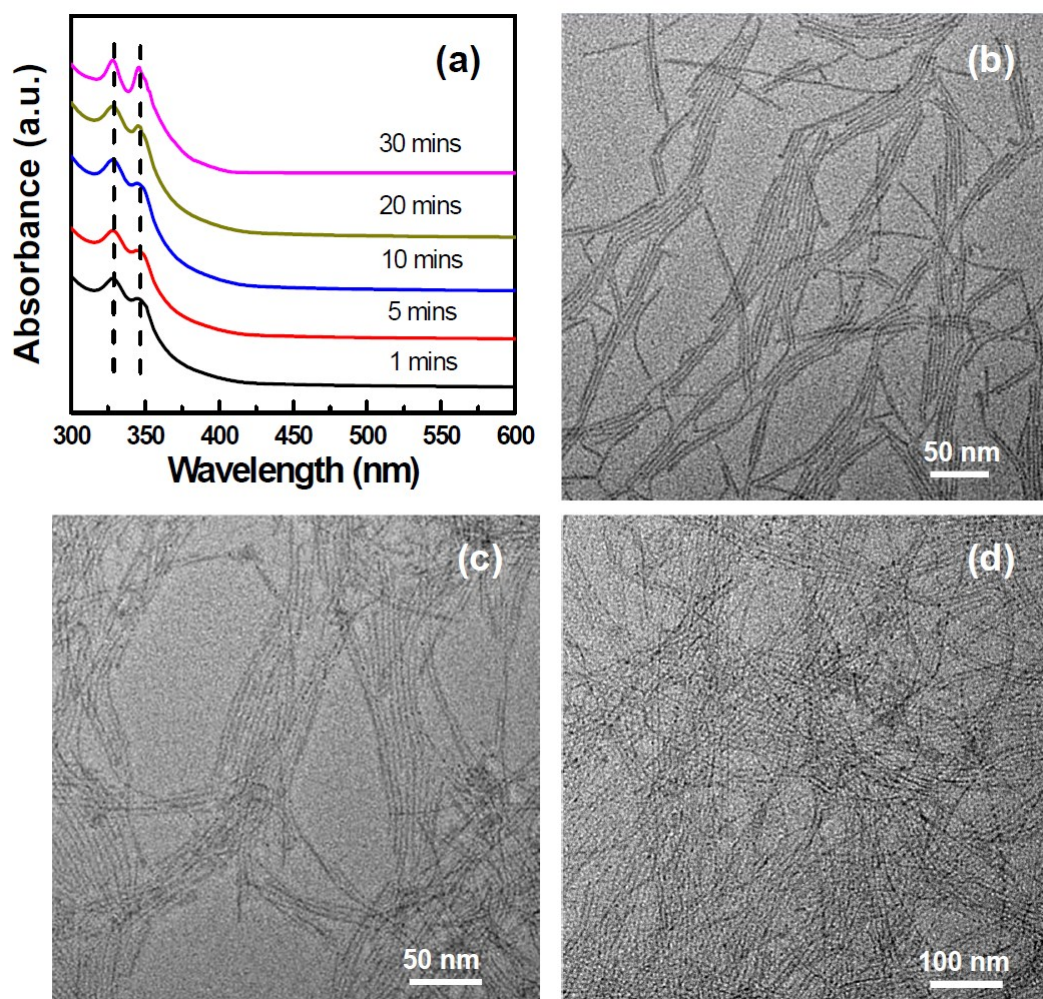

**Figure S5.** (a) Temporal evolution of UV-vis absorption spectra of the ZnSe USNWs (with a diameter of 2.1 nm) upon increasing temperature to 220 °C. (b-d) TEM images depicting the morphology evolution of the ZnSe USNWs growing at 220 °C for 1 mins (b), 5 mins (c) and 30 mins (d).



**Table S1.**  $E_{vb}$ ,  $E_{cb}$  and  $E_g$  values of the as-prepared ZnSe NWs of different diameters.

| NW Sample       | Optical measurement |          | Electrochemical measurement |             |          |
|-----------------|---------------------|----------|-----------------------------|-------------|----------|
|                 | $A_{bs}/nm$         | $E_g/eV$ | $E_{cb}/eV$                 | $E_{vb}/eV$ | $E_g/eV$ |
| ZnSe NWs-2.1 nm | 373                 | 3.32     | -5.80                       | -2.41       | 3.39     |
| ZnSe NWs-3.1 nm | 385                 | 3.22     | -5.75                       | -2.51       | 3.24     |
| ZnSe NWs-4.5 nm | 426                 | 2.91     | -5.46                       | -2.52       | 2.94     |

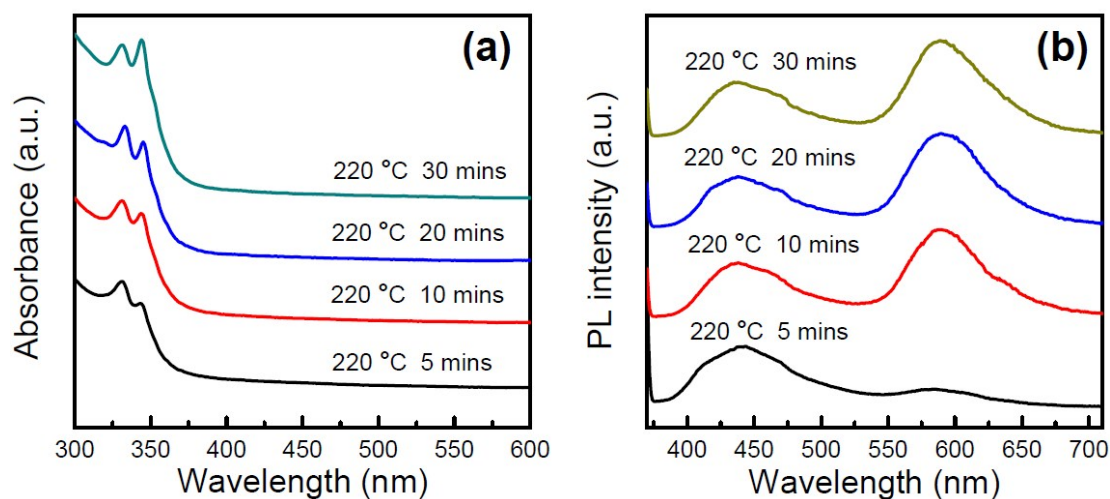

**Figure S6.** Temporal evolution of UV-vis absorption spectra (a) and PL emission spectra (b) recording the doping of  $Mn^{2+}$  into the ZnSe USNWs with a diameter of 2.1 nm at 220 °C for different reaction times.

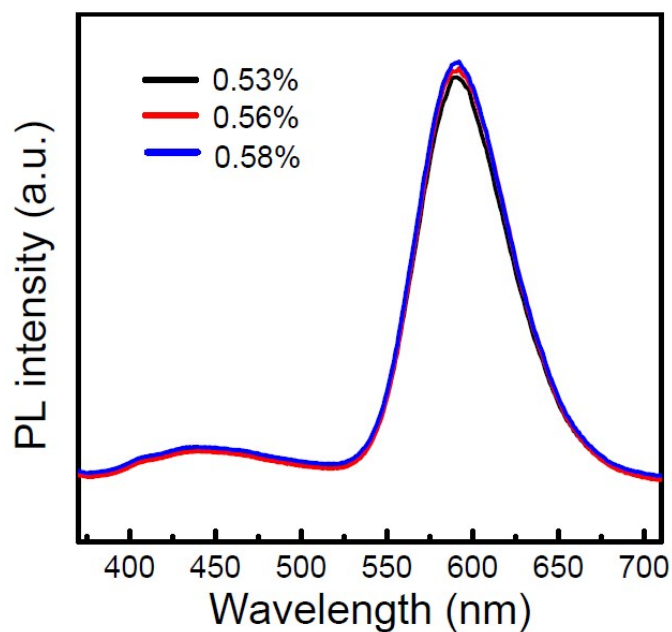

**Figure S7.** PL emission spectra of  $\text{Mn}^{2+}$ -doped ZnSe USNWs of 2.1 nm diameter with different  $\text{Mn}^{2+}$  doping levels (from 0.53% to 0.56%, and then to 0.58%) upon increasing dopant concentration (from 5 mol.% to 8 mol.% and then to 10 mol.%).

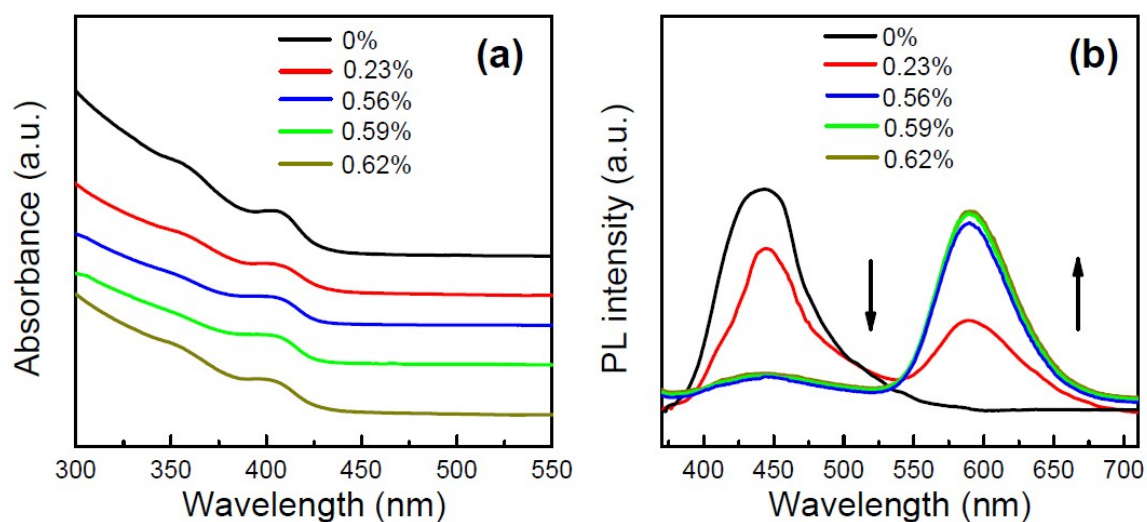

**Figure S8.** UV-vis absorption spectra (a) and PL emission spectra (b) of  $\text{Mn}^{2+}$ -doped ZnSe NWs of 4.5 nm diameter with different  $\text{Mn}^{2+}$  doping levels (from 0% to 0.62%) upon increasing dopant concentration (from 0 mol.% to 5.0 mol.%).

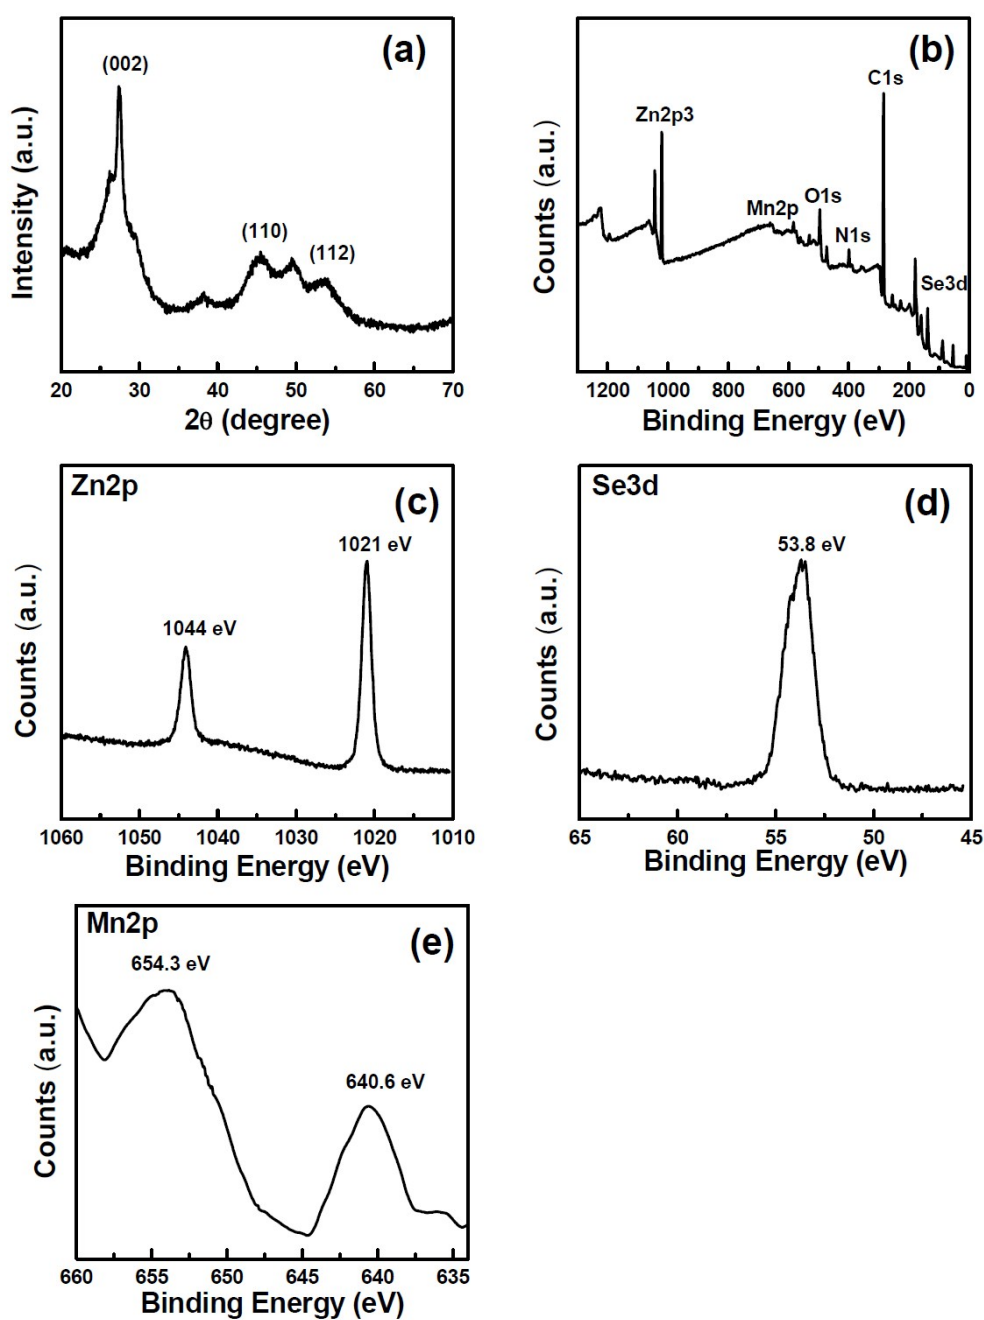

**Figure S9.** (a) XRD patterns, (b) full-range XPS spectrum, (c) Zn<sub>2p</sub>, (d) Se<sub>3d</sub> and (e) Mn<sub>2p</sub> core level of Mn<sup>2+</sup>-doped ZnSe USNWs with a diameter of 2.1 nm (containing 0.28% Mn<sup>2+</sup>) (the ones displayed in Figure 7 in main text). The peak at 640.6 eV and 654.3 eV correspond to the binding energies of Mn<sub>2p<sub>3/2</sub></sub> and Mn<sub>2p<sub>1/2</sub></sub> core level respectively,<sup>3</sup> signifying that Mn ions were successfully doped into the ZnSe USNWs with a diameter of 2.1 nm.

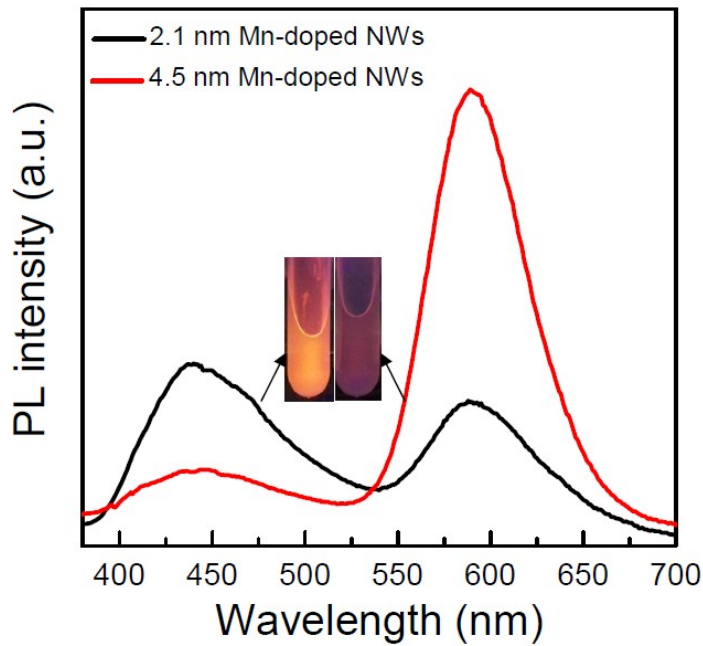

**Figure S10.** PL emission spectra of  $\text{Mn}^{2+}$ -doped ZnSe NWs of 2.1 nm diameter (containing 0.28%  $\text{Mn}^{2+}$ ) and of 4.5 nm diameter (containing 0.62%  $\text{Mn}^{2+}$ ) dispersed in chloroform. The insert is the optical photograph of the two ZnSe NW samples dispersed in chloroform under 365 nm UV lamp excitation.

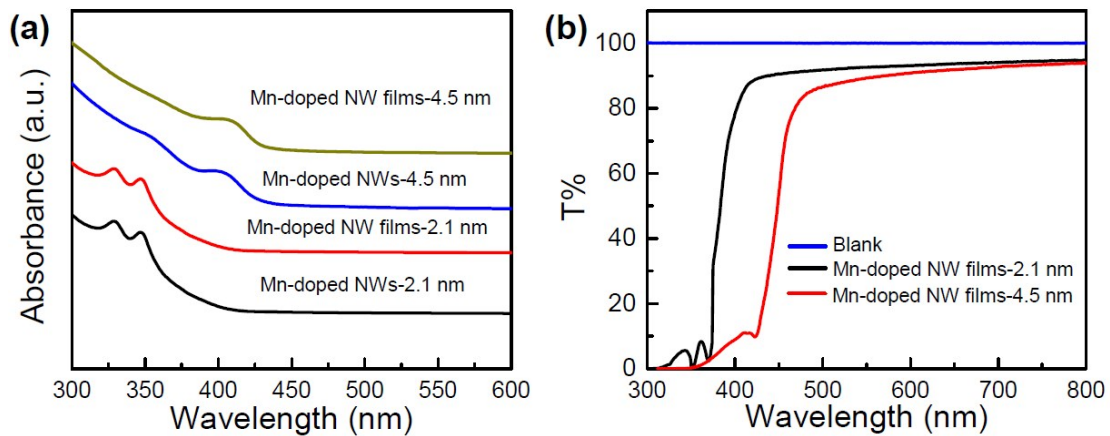

**Figure S11.** (a) UV-vis absorption spectra of the Mn-doped ZnSe NWs of 2.1 nm diameter (containing 0.28%  $\text{Mn}^{2+}$ ) and of 4.5 nm diameter (containing 0.62%  $\text{Mn}^{2+}$ ), which are both spin-coated on quartz sheets and dispersed in chloroform, respectively, (b) Transmission spectra of the two NW films spin-coated on two quartz sheets.



## References

1. B. J. Xi, S. L. Xiong, D. C. Xu, J. F. Li, H. Y. Zhou, J. Pan, J. Y. Li and Y. T. Qian, *Chem. Eur. J.*, 2008, **14**, 9786-9791.
2. S. L. Xiong, B. J. Xi, C. M. Wang, G. C. Xi, X. Y. Liu and Y. T. Qian, *Chem. Eur. J.*, 2007, **13**, 7926-7932
3. C. C. Chen, Y. J. Hsu, Y. F. Lin and S. Y. Lu, *J. Phys. Chem. C*, 2008, **112**, 17964-17968.
